# Supplementary material for: The Role of Nurse on the Treatment Decision Support for Older People with Cancer: A Systematic Review
Source: MDPI journal article supplement (doi:10.3390/healthcare11040546), 2023-02-12
Supplement: s1 [file s1]

Supplementary File S1. Key words

|                          | #1 decision making                                                                                                                                   | #2 older adult                                                               | #3 role of nurse                                                                                                                                                                      | #4 cancer                    |
|--------------------------|------------------------------------------------------------------------------------------------------------------------------------------------------|------------------------------------------------------------------------------|---------------------------------------------------------------------------------------------------------------------------------------------------------------------------------------|------------------------------|
| PubMed/<br>MeSH          | Decision Making<br>Decision Support Techniques<br>Advance Care planning<br>Advance Directives                                                        | Aged (65+)<br>Aged, 80 and over<br>Frail Elderly                             | Nurse's Role<br>Nurses<br>Health Personnel                                                                                                                                            | Neoplasms                    |
| PubMed/<br>related terms | "Decision Making"<br>"Decision Support"<br>"Decision Aid"<br>"Patient Centered Care"<br>"Advance Health Care Planning"<br>"Advance Medical Planning" | "Older people"<br>"Older Adult"<br>Elderly<br>"Old Person"<br>"Older Person" | "role of nurse"<br>"Nursing Role"<br>"Professional Role"<br>"Medical Personnel"<br>"Health Care Provider"<br>"Healthcare Worker"<br>"Health Care Professional"<br>"Health Care Staff" | cancer<br>Tumor<br>Malignan* |
| CINAHL/<br>Hedings       | decision making+<br>Decision Support Techniques+<br>Advance Care Planning<br>Patient Centered Care<br>Advance Directives+                            | Aged+<br>Aged, 80 and Over+<br>Frail Elderly                                 | Nursing Role<br>Professional Role+<br>Nurses+<br>Health Personnel+                                                                                                                    | Neoplasms+                   |

|                            | #1 decision making                                                                                                                       | #2 older adult                                                               | #3 role of nurse                                                                                                                                 | #4 cancer                    |
|----------------------------|------------------------------------------------------------------------------------------------------------------------------------------|------------------------------------------------------------------------------|--------------------------------------------------------------------------------------------------------------------------------------------------|------------------------------|
| CINAHL/<br>related terms   | Decision making<br>Decision Support<br>Decision Aid<br>Advance Health Care Planning<br>Advance Medical Planning                          | Older people<br>Older Adult<br>Elderly<br>Old Person<br>Older Person         | role of nurse<br>Nurse's Role<br>Health Care Staff<br>Medical Personnel<br>Health Care Provider<br>Healthcare Worker<br>Health Care Professional | cancer<br>Tumor<br>Malignan* |
| PsycInfo/<br>Index Terms   | decision making<br>Patient Centered Care<br>Advance Directives                                                                           |                                                                              | Professional Role+<br>Nurses+<br>Health Personnel+<br>Medical Personnel+                                                                         | Neoplasms+                   |
| PsycInfo/<br>related terms | Decision making<br>Decision Support<br>Decision Aid<br>Advance Care Planning<br>Advance Health Care Planning<br>Advance Medical Planning | aged<br>Older people<br>Older Adult<br>Elderly<br>Old Person<br>Older Person | role of nurse<br>Nurse's Role<br>Nursing Role<br>Health Care Provider<br>Healthcare Worker<br>Health Care Professional<br>Health Care Staff      | cancer<br>Tumor<br>Malignan* |

Supplementary File S2. Searches

PubMed

| Search number | Query                                                                                                                                                                                                                                                                                                                                                                                                                                                                                                                                                                                                                                                                                                                                                                                                              | Results   |
|---------------|--------------------------------------------------------------------------------------------------------------------------------------------------------------------------------------------------------------------------------------------------------------------------------------------------------------------------------------------------------------------------------------------------------------------------------------------------------------------------------------------------------------------------------------------------------------------------------------------------------------------------------------------------------------------------------------------------------------------------------------------------------------------------------------------------------------------|-----------|
| 1             | "Decision Making"[MeSH Terms] OR "decision support techniques"[MeSH Terms] OR "advance care planning"[MeSH Terms] OR "advance directives"[MeSH Terms] OR "Decision Making"[All Fields] OR "Decision Support"[All Fields] OR "Decision Aid"[All Fields] OR "Patient Centered Care"[All Fields] OR "Advance Health Care Planning"[All Fields] OR "Advance Medical Planning"[All Fields]                                                                                                                                                                                                                                                                                                                                                                                                                              | 499,604   |
| 2             | "aged"[MeSH Terms] OR "aged, 80 and over"[MeSH Terms] OR "frail elderly"[MeSH Terms] OR "Older people"[All Fields] OR "Older Adult"[All Fields] OR "aged"[MeSH Terms] OR "aged"[All Fields] OR "elderly"[All Fields] OR "elderlies"[All Fields] OR "elderly s"[All Fields] OR "elderlys"[All Fields] OR "Old Person"[All Fields] OR "Older Person"[All Fields]                                                                                                                                                                                                                                                                                                                                                                                                                                                     | 5,937,341 |
| 3             | "nurse s role"[MeSH Terms] OR "nurses"[MeSH Terms] OR "health personnel"[MeSH Terms] OR "role of nurse"[All Fields] OR "Nursing Role"[All Fields] OR "Professional Role"[All Fields] OR "Medical Personnel"[All Fields] OR "Health Care Provider"[All Fields] OR "Healthcare Worker"[All Fields] OR "Health Care Professional"[All Fields] OR "Health Care Staff"[All Fields]                                                                                                                                                                                                                                                                                                                                                                                                                                      | 641,597   |
| 4             | "neoplasms"[MeSH Terms] OR "cancer s"[All Fields] OR "cancerated"[All Fields] OR "canceration"[All Fields] OR "cancerization"[All Fields] OR "cancerized"[All Fields] OR "cancerous"[All Fields] OR "neoplasms"[MeSH Terms] OR "neoplasms"[All Fields] OR "cancer"[All Fields] OR "cancers"[All Fields] OR "cysts"[MeSH Terms] OR "cysts"[All Fields] OR "cyst"[All Fields] OR "neurofibroma"[MeSH Terms] OR "neurofibroma"[All Fields] OR "neurofibromas"[All Fields] OR "tumor s"[All Fields] OR "tumoral"[All Fields] OR "tumorous"[All Fields] OR "tumour"[All Fields] OR "neoplasms"[MeSH Terms] OR "neoplasms"[All Fields] OR "tumor"[All Fields] OR "tumour s"[All Fields] OR "tumoural"[All Fields] OR "tumourous"[All Fields] OR "tumours"[All Fields] OR "tumors"[All Fields] OR "malignan*"[All Fields] | 5,332,532 |

#1 AND #2 AND #3 AND #4

1,656

CINAHL ※ 「+」 narrower terms

| Search number | Query | Results |
|---------------|-------|---------|
|---------------|-------|---------|

|    |                                                                                                                                                                                                                                                                                 |         |
|----|---------------------------------------------------------------------------------------------------------------------------------------------------------------------------------------------------------------------------------------------------------------------------------|---------|
| S1 | (MH "Decision Making+") OR (MH "Decision Support Techniques+") OR (MH "Advance Care Planning") OR (MH "Patient Centered Care") OR (MH "Advance Directives+") OR Decision making OR Decision Support OR Decision Aid OR Advance Health Care Planning OR Advance Medical Planning | 227,782 |
| S2 | (MH "Aged+") OR (MH "Aged, 80 and Over+") OR (MH "Frail Elderly") OR Older people OR Older Adult OR Elderly OR Old Person OR Older Person                                                                                                                                       | 976,381 |
| S3 | (MH "Nursing Role") OR (MH "Professional Role+") OR (MH "Nurses+") OR (MH "Health Personnel+") OR role of nurse OR Nurse's Role OR Health Care Staff OR Medical Personnel OR Health Care Provider OR Healthcare Worker OR Health Care Professional                              | 773,074 |
| S4 | (MH "Neoplasms+") OR cancer OR Tumor OR Malignan*                                                                                                                                                                                                                               | 61,839  |

S1 AND S2 AND S3 AND S4

856

APA PsycInfo ✖blue words are narrower terms

| Search number | Query                                                                                                                                                                                                                                                                                                                              | Results |
|---------------|------------------------------------------------------------------------------------------------------------------------------------------------------------------------------------------------------------------------------------------------------------------------------------------------------------------------------------|---------|
| S1            | ((DE "Decision Making" OR DE "Choice Behavior" OR DE "Group Decision Making" OR DE "Management Decision Making") OR (DE "Patient Centered Care")) OR (DE "Advance Directives") OR decision making process OR Decision Support OR Decision Aid OR Advance Care Planning OR Advance Health Care Planning OR Advance Medical Planning | 141,500 |
| S2            | aged OR Older people OR Older Adult OR Elderly OR Old Person OR Older Person                                                                                                                                                                                                                                                       | 707,574 |

|    |                                                                                                                                                                                                                                                                                                                                                                                                                                                                                                                                                                                                                                                                                                                                     |         |
|----|-------------------------------------------------------------------------------------------------------------------------------------------------------------------------------------------------------------------------------------------------------------------------------------------------------------------------------------------------------------------------------------------------------------------------------------------------------------------------------------------------------------------------------------------------------------------------------------------------------------------------------------------------------------------------------------------------------------------------------------|---------|
| S3 | (((DE "Professional Role" OR DE "Counselor Role" OR DE "Professional Boundaries" OR DE "Therapist Role") OR (DE "Nurses" OR DE "Psychiatric Nurses" OR DE "Public Health Service Nurses" OR DE "School Nurses"))) OR (DE "Health Personnel" OR DE "Allied Health Personnel" OR DE "Caregivers" OR DE "Medical Personnel" OR DE "Mental Health Personnel")) OR (DE "Medical Personnel" OR DE "Dentists" OR DE "Military Medical Personnel" OR DE "Nurses" OR DE "Optometrists" OR DE "Pharmacists" OR DE "Physical Therapists" OR DE "Physicians" OR DE "Psychiatric Hospital Staff") OR role of nurse OR Nurse's Role OR Nursing Role OR Health Care Provider OR Healthcare Worker OR Health Care Professional OR Health Care Staff | 179,049 |
| S4 | (DE "Neoplasms" OR DE "Benign Neoplasms" OR DE "Breast Neoplasms" OR DE "Endocrine Neoplasms" OR DE "Leukemias" OR DE "Melanoma" OR DE "Metastasis" OR DE "Nervous System Neoplasms" OR DE "Terminal Cancer") OR cancer OR Tumor OR Malignan*                                                                                                                                                                                                                                                                                                                                                                                                                                                                                       | 114,721 |

S1 AND S2 AND S3 AND S4

491

Supplementary File S3. Scores

| Reference            | S1. Are there clear research questions? | S2. Do the collected data allow to address the research questions? | 1. Qualitative                               | 1.1. Is the qualitative approach appropriate to answer the research question?                         | 1.2. Are the qualitative data collection methods adequate to address the research question?            | 1.3. Are the findings adequately derived from the data?                                                   | 1.4. Is the interpretation of results sufficiently substantiated by data?                                  | 1.5. Is there coherence between qualitative data sources, collection, analysis and interpretation                       |
|----------------------|-----------------------------------------|--------------------------------------------------------------------|----------------------------------------------|-------------------------------------------------------------------------------------------------------|--------------------------------------------------------------------------------------------------------|-----------------------------------------------------------------------------------------------------------|------------------------------------------------------------------------------------------------------------|-------------------------------------------------------------------------------------------------------------------------|
|                      |                                         |                                                                    | 2. Quantitative randomized controlled trials | 2.1. Is randomization appropriately performed                                                         | 2.2. Are the groups comparable at baseline?                                                            | 2.3. Are there complete outcome data?                                                                     | 2.4. Are outcome assessors blinded to the intervention provided?                                           | 2.5 Did the participants adhere to the assigned intervention?                                                           |
|                      |                                         |                                                                    | 3. Quantitative non-randomized               | 3.1. Are the participants representative of the target population?                                    | 3.2. Are measurements appropriate regarding both the outcome and intervention (or exposure)?           | 3.3. Are there complete outcome data?                                                                     | 3.4. Are the confounders accounted for in the design and analysis?                                         | 3.5. During the study period, is the intervention administered (or exposure occurred) as intended?                      |
|                      |                                         |                                                                    | 4. Quantitative descriptive                  | 4.1. Is the sampling strategy relevant to address the research question?                              | 4.2. Is the sample representative of the target population?                                            | 4.3. Are the measurements appropriate?                                                                    | 4.4. Is the risk of nonresponse bias low?                                                                  | 4.5. Is the statistical analysis appropriate to answer the research question?                                           |
|                      |                                         |                                                                    | 5. Mixed methods                             | 5.1. Is there an adequate rationale for using a mixed methods design to address the research question | 5.2. Are the different components of the study effectively integrated to answer the research question? | 5.3. Are the outputs of the integration of qualitative and quantitative components adequately interpreted | 5.4. Are divergences and inconsistencies between quantitative and qualitative results adequately addressed | 5.5. Do the different components of the study adhere to the quality criteria of each tradition of the methods involved? |
| Tariman et al., 2014 | YES                                     | YES                                                                | 5                                            | YES                                                                                                   | YES                                                                                                    | YES                                                                                                       | YES                                                                                                        | YES                                                                                                                     |

|                            |     |     |   |     |     |     |     |     |
|----------------------------|-----|-----|---|-----|-----|-----|-----|-----|
| Bridges et al., 2015       | YES | YES | 1 | YES | YES | YES | YES | YES |
| Burton et al., 2017        | YES | YES | 4 | YES | YES | YES | YES | YES |
| Jones, et al., 2018        | YES | YES | 1 | YES | YES | YES | YES | YES |
| McWilliams et al.,<br>2018 | YES | YES | 1 | YES | YES | YES | YES | YES |
| Sattar et al., 2018        | YES | YES | 1 | YES | YES | YES | YES | YES |
| de Angst et al.,<br>2019   | YES | YES | 4 | YES | YES | YES | YES | YES |
| Griffiths et al., 2020     | YES | YES | 1 | YES | YES | YES | YES | YES |
| Shen et al., 2020          | YES | YES | 3 | YES | YES | YES | NO  | YES |
| Festen et al., 2021        | YES | YES | 4 | YES | YES | YES | YES | YES |
| Dijkman et al., 2022       | YES | YES | 1 | YES | YES | YES | YES | YES |
